# Supplementary material for: Genome-wide transcriptome analysis reveal the molecular mechanism for triggering the formation of purple leaves in rice mutants nip-lpl and nip-dpl
Source: Front Plant Sci. 2025 May 30;16:1584423. doi: 10.3389/fpls.2025.1584423 (PMC12162559; doi:10.3389/fpls.2025.1584423)
Supplement: Supplementary file 3 [file Table2.xlsx]

## Sheet: Sheet1
Table S1. Overview of the RNA-sequencing reads generated from each sample.
Sample		Total		Unmapped(%)		Unique_Mapped(%)		Multiple_Mapped(%)		Total_Mapped(%)
nip-lpl-a1		48930572		1263471 (2.58%)		46375069 (94.78%)		1292032 (2.64%)		47667101 (97.42%)
nip-lpl-a2		45701874		1348817 (2.95%)		43150798 (94.42%)		1202259 (2.63%)		44353057 (97.05%)
nip-lpl-a3		49263612		1496996 (3.04%)		46443566 (94.28%)		1323050 (2.69%)		47766616 (96.96%)
nip-lpl-c1		43070488		1775390 (4.12%)		40224053 (93.39%)		1071045 (2.49%)		41295098 (95.88%)
nip-lpl-c2		46767646		1947282 (4.16%)		43570218 (93.16%)		1250146 (2.67%)		44820364 (95.84%)
nip-lpl-c3		47556252		1818790 (3.82%)		44547839 (93.67%)		1189623 (2.50%)		45737462 (96.18%)
nip-dpl-a1		49971896		1218853 (2.44%)		47493298 (95.04%)		1259745 (2.52%)		48753043 (97.56%)
nip-dpl-a2		46324524		1250297 (2.70%)		43878169 (94.72%)		1196058 (2.58%)		45074227 (97.30%)
nip-dpl-a3		44597456		1197236 (2.68%)		42367439 (95.00%)		1032781 (2.32%)		43400220 (97.32%)
nip-dpl-c1		54682326		1656820 (3.03%)		51556318 (94.28%)		1469188 (2.69%)		53025506 (96.97%)
nip-dpl-c2		45633478		1478972 (3.24%)		42928610 (94.07%)		1225896 (2.69%)		44154506 (96.76%)
nip-dpl-c3		44107180		1293216 (2.93%)		41639652 (94.41%)		1174312 (2.66%)		42813964 (97.07%)
Nip-a1		43407728		919458 (2.12%)		41387705 (95.35%)		1100565 (2.54%)		42488270 (97.88%)
Nip-a2		53025558		1135094 (2.14%)		50365243 (94.98%)		1525221 (2.88%)		51890464 (97.86%)
Nip-a3		46253972		1013753 (2.19%)		44044852 (95.22%)		1195367 (2.58%)		45240219 (97.81%)
Nip-c1		47445254		1048194 (2.21%)		45167603 (95.20%)		1229457 (2.59%)		46397060 (97.79%)
Nip-c2		54412842		1283537 (2.36%)		51612094 (94.85%)		1517211 (2.79%)		53129305 (97.64%)
Nip-c3		50915434		1083599 (2.13%)		48471538 (95.20%)		1360297 (2.67%)		49831835 (97.87%)
